# Supplementary material for: Benthic Microbial Communities in a Seasonally Ice-Covered Sub-Arctic River (Pasvik River, Norway) Are Shaped by Site-Specific Environmental Conditions
Source: MDPI journal article supplement (doi:10.3390/microorganisms10051022), 2022-05-12
Supplement: s1 [file s1]

## **Supplementary Materials:**

**Supplementary Figure S1.** Venn showing OTUs shared between Ice-melt [-] and Ice-melt [+] periods.

**Supplementary Table S1.** Next-generation sequencing results, number of good quality reads, OTUs and diversity indices obtained from data analysis for sediment samples collected during Ice-melt(-) and Ice-melt(+) periods. Figure S3: Venn diagrams representing OTU-sharing between samples: a) riverine stations in May; b) riverine stations in July; c) brackish stations in May; d) brackish stations in July.

**Supplementary Table S2.** Pairwise Pearson Correlations (for most significant value) among the organic pollutants and physico-chemical parameters of sediments during the Ice-melt(-) and Ice-melt(+) period. The sample size is given in brackets, and the *p* value is given in italic.

**Supplementary Table S3.** Pairwise Pearson Correlations (for most significant values) among the inorganic pollutants and physico-chemical parameters of sediments during the Ice-melt(-) and Ice-melt(+) period. The sample size is given in brackets, and the *p* value is given in italic.

**Supplementary Table S4.** Pairwise Pearson Correlations (for most significant values) among the organic pollutants and bio-logical parameters of sediments during the Ice-melt(-) period and Ice-melt(+) period. The sample size is given in brackets, and the *p* value is given in italic.

**Supplementary Table S5.** Pairwise Pearson Correlations (for most significant values) among the inorganic pollutants and bio-logical parameters of sediments during the Ice-melt(-) period and Ice-melt(+) period. The sample size is given in brackets, and the *p* value is given in italic.

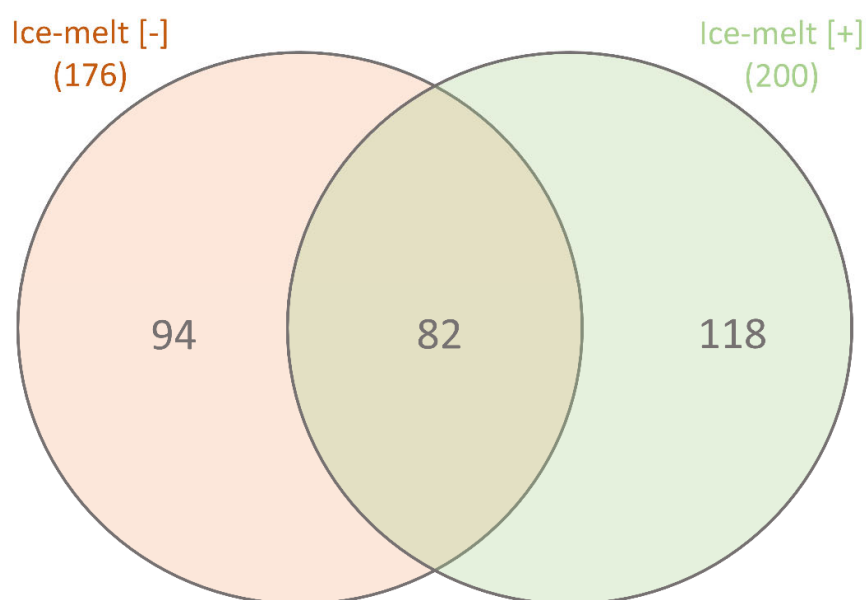

**Supplementary Figure S1.** Venn showing OTUs shared between Ice-melt [-] and Ice-melt [+] periods.

**Supplementary Table S1.** Next-generation sequencing results, number of good quality reads, OTUs and diversity indices obtained from data analysis for sediment samples collected during Ice-melt(-) and Ice-melt(+) periods.

|                        |             | <i>Riverine Stations</i> |       |       |       |       | <i>Brackish Stations</i> |       |       |       |
|------------------------|-------------|--------------------------|-------|-------|-------|-------|--------------------------|-------|-------|-------|
|                        |             | St.9                     | St.5  | St.1  | St.2  | St.8  | St.3                     | St.7  | St.6  | St.4  |
| Total Reads            | Ice-melt(-) | nd                       | 7223  | 6274  | 7274  | 7382  | 6722                     | 4987  | 4005  | 5850  |
|                        | Ice-melt(+) | 6896                     | 6511  | 5712  | 9474  | 6218  | nd                       | 4950  | nd    | 4600  |
| GC (%)                 | Ice-melt(-) | nd                       | 55    | 55    | 57    | 53    | 55                       | 53    | 53    | 53    |
|                        | Ice-melt(+) | 54                       | 54    | 55    | 54    | 53    | nd                       | 55    | nd    | 54    |
| Good quality reads (%) | Ice-melt(-) | nd                       | 32.8  | 45.1  | 45.2  | 56.5  | 41.8                     | 51.4  | 46.6  | 42.6  |
|                        | Ice-melt(+) | 46.2                     | 44.6  | 34.2  | 43.7  | 48.2  | nd                       | 44.8  | nd    | 50.1  |
| OTUs                   | Ice-melt(-) | nd                       | 34    | 31    | 38    | 49    | 34                       | 37    | 14    | 25    |
|                        | Ice-melt(+) | 72                       | 26    | 35    | 39    | 38    | nd                       | 53    | nd    | 18    |
| Shannon                | Ice-melt(-) | nd                       | 2.322 | 2.22  | 2.373 | 2.196 | 2.196                    | 2.225 | 1.881 | 1.968 |
|                        | Ice-melt(+) | 2.603                    | 2.121 | 2.309 | 2.376 | 2.255 | nd                       | 2.493 | nd    | 1.903 |

|              |             |        |        |        |        |        |        |        |        |        |
|--------------|-------------|--------|--------|--------|--------|--------|--------|--------|--------|--------|
| Inv. Simpson | Ice-melt(-) | nd     | 0.7387 | 0.7336 | 0.7392 | 0.726  | 0.7287 | 0.7328 | 0.7209 | 0.7218 |
|              | Ice-melt(+) | 0.7416 | 0.7295 | 0.7372 | 0.7394 | 0.7331 | nd     | 0.7408 | nd     | 0.7194 |
| Evenness     | Ice-melt(-) | nd     | 0.2914 | 0.2877 | 0.2752 | 0.1798 | 0.2569 | 0.2434 | 0.4371 | 0.2754 |
|              | Ice-melt(+) | 0.1851 | 0.3089 | 0.2796 | 0.269  | 0.2444 | nd     | 0.2239 | nd     | 0.3528 |

**Supplementary Table S2.** Pairwise Pearson Correlations (for most significant value) among the organic pollutants and physico-chemical parameters of sediments during the *Ice-melt(-)* and *Ice-melt(+)* period. The sample size is given in brackets, and the p value is given in italic.

| Sample 1           | Sample 2                    | Correlation | 95% CI for $\rho$ | P-Value      |
|--------------------|-----------------------------|-------------|-------------------|--------------|
| <i>Ice-melt(-)</i> |                             |             |                   |              |
| C-ORG              | Dieldrin                    | 0.853       | (0.435; 0.968)    | <i>0.003</i> |
| CN                 | Dieldrin                    | 0.740       | (-0.030; 0.959)   | <i>0.057</i> |
| $\Sigma$ DDX       | S HCH                       | 0.710       | (0.087; 0.934)    | <i>0.032</i> |
| MUD                | $\Sigma$ Heptachlor Epoxide | 0.850       | (0.427; 0.968)    | <i>0.004</i> |
| SAND               | $\Sigma$ Heptachlor Epoxide | -0.850      | (-0.968; -0.427)  | <i>0.004</i> |
| C-ORG              | $\Sigma$ Heptachlor Epoxide | 0.775       | (0.228; 0.950)    | <i>0.014</i> |
| C-ORG              | MUD                         | 0.731       | (0.129; 0.939)    | <i>0.025</i> |
| CN                 | MUD                         | -0.815      | (-0.972; -0.159)  | <i>0.026</i> |
| C-ORG              | SAND                        | -0.731      | (-0.939; -0.129)  | <i>0.025</i> |
| CN                 | SAND                        | 0.815       | (0.159; 0.972)    | <i>0.026</i> |
| N-TOT              | C-ORG                       | 0.848       | (0.264; 0.977)    | <i>0.016</i> |
| C-TOT              | C-ORG                       | 0.877       | (0.366; 0.982)    | <i>0.009</i> |
| C-INORG            | C-ORG                       | 0.714       | (-0.084; 0.954)   | <i>0.071</i> |
| C-TOT              | N-TOT                       | 0.962       | (0.760; 0.995)    | <i>0.001</i> |
| C-INORG            | N-TOT                       | 0.924       | (0.561; 0.989)    | <i>0.003</i> |
| C-INORG            | C-TOT                       | 0.962       | (0.761; 0.995)    | <i>0.001</i> |
| <i>Ice-melt(+)</i> |                             |             |                   |              |
| MUD                | $\Sigma$ PCBs               | 0.726       | (0.120; 0.938)    | <i>0.027</i> |
| SAND               | $\Sigma$ PCBs               | -0.726      | (-0.938; -0.120)  | <i>0.027</i> |
| HCB                | PCB028                      | 0.670       | (0.010; 0.923)    | <i>0.048</i> |
| C-TOT              | PCB028                      | 0.867       | (-0.066; 0.991)   | <i>0.057</i> |
| C-INORG            | PCB028                      | 0.874       | (-0.036; 0.992)   | <i>0.053</i> |
| CN                 | PCB101                      | 0.831       | (-0.192; 0.989)   | <i>0.081</i> |
| CN                 | Aldrin                      | 0.914       | (0.162; 0.994)    | <i>0.030</i> |
| $\Sigma$ HCH       | Isodrin                     | 0.738       | (0.144; 0.941)    | <i>0.023</i> |
| CN                 | Isodrin                     | 0.871       | (-0.050; 0.991)   | <i>0.055</i> |
| C-ORG              | MUD                         | 0.712       | (-0.088; 0.954)   | <i>0.073</i> |
| CN                 | SAND                        | 0.549       | (-0.646; 0.964)   | <i>0.338</i> |
| C-INORG            | SAND                        | -0.351      | (-0.942; 0.770)   | <i>0.563</i> |
| D13C               | C-ORG                       | -0.249      | (-0.844; 0.620)   | <i>0.591</i> |
| N-TOT              | C-ORG                       | 0.879       | (-0.016; 0.992)   | <i>0.050</i> |
| C-TOT              | C-ORG                       | 0.997       | (0.951; 1.000)    | <i>0.000</i> |
| CN                 | C-ORG                       | 0.089       | (-0.861; 0.900)   | <i>0.887</i> |
| C-INORG            | C-ORG                       | 0.930       | (0.263; 0.995)    | <i>0.022</i> |
| C-TOT              | N-TOT                       | 0.857       | (-0.102; 0.990)   | <i>0.063</i> |
| C-INORG            | C-TOT                       | 0.956       | (0.470; 0.997)    | <i>0.011</i> |

**Supplementary Table S3.** Pairwise Pearson Correlations (for most significant values) among the inorganic pollutants and physico-chemical parameters of sediments during the *Ice-melt(-)* and *Ice-melt(+)* period. The sample size is given in brackets, and the p value is given in italic.

| <b>Sample 1</b>     | <b>Sample 2</b> | <b>Correlation</b> | <b>95% CI for <math>\rho</math></b> | <b>p-Value</b> |
|---------------------|-----------------|--------------------|-------------------------------------|----------------|
| <i>Ice-melt (-)</i> |                 |                    |                                     |                |
| MUD                 | Be              | 0.745              | (0.160; 0.943)                      | <i>0.021</i>   |
| Sb                  | Cr              | 0.998              | (0.991; 1.000)                      | <i>0.000</i>   |
| Ba                  | Cr              | 0.992              | (0.962; 0.998)                      | <i>0.000</i>   |
| Hg                  | Cr              | 0.996              | (0.980; 0.999)                      | <i>0.000</i>   |
| D13C                | Cr              | -0.705             | (-0.933; -0.077)                    | <i>0.034</i>   |
| D13C                | Co              | -0.732             | (-0.939; -0.131)                    | <i>0.025</i>   |
| D13C                | Ni              | -0.676             | (-0.925; -0.021)                    | <i>0.046</i>   |
| CN                  | Se              | -0.898             | (-0.985; -0.449)                    | <i>0.006</i>   |
| D13C                | Mo              | -0.707             | (-0.933; -0.080)                    | <i>0.033</i>   |
| MUD                 | Cd              | 0.586              | (-0.129; 0.900)                     | <i>0.098</i>   |
| SAND                | Cd              | -0.586             | (-0.900; 0.129)                     | <i>0.098</i>   |
| CN                  | Cd              | -0.732             | (-0.957; 0.048)                     | <i>0.062</i>   |
| CN                  | Sn              | -0.810             | (-0.971; -0.145)                    | <i>0.027</i>   |
| D13C                | Sb              | -0.679             | (-0.926; -0.027)                    | <i>0.044</i>   |
| D13C                | Ba              | -0.777             | (-0.951; -0.234)                    | <i>0.014</i>   |
| MUD                 | Tl              | 0.630              | (-0.058; 0.912)                     | <i>0.069</i>   |
| SAND                | Tl              | -0.630             | (-0.912; 0.058)                     | <i>0.069</i>   |
| CN                  | Tl              | -0.757             | (-0.962; -0.008)                    | <i>0.049</i>   |
| N-TOT               | Pb              | 0.728              | (-0.054; 0.957)                     | <i>0.063</i>   |
| C-<br>INORG         | Mg              | 0.349              | (-0.548; 0.873)                     | <i>0.443</i>   |
| C-TOT               | Fe              | 0.758              | (0.012; 0.962)                      | <i>0.048</i>   |
| C-<br>INORG         | Fe              | 0.789              | (0.089; 0.967)                      | <i>0.035</i>   |
| <i>Ice-melt(+)</i>  |                 |                    |                                     |                |
| D13C                | Sb              | 0.672              | (-0.164; 0.946)                     | <i>0.098</i>   |
| N-TOT               | Ba              | -0.827             | (-0.988; 0.204)                     | <i>0.084</i>   |

**Supplementary Table S4.** Pairwise Pearson Correlations (for most significative values) among the organic pollutants and biological parameters of sediments during the *Ice-melt(-)* period and *Ice-melt(+)* period. The sample size is given in brackets, and the p value is given in italic.

| Sample 1             | Sample 2            | Correlation | 95% CI for $\rho$ | p-Value      |
|----------------------|---------------------|-------------|-------------------|--------------|
| <i>Ice-melt(-)</i>   |                     |             |                   |              |
| Deltaproteobacteria  | LAP                 | 0.780       | (0.065; 0.966)    | <i>0.039</i> |
| Bacteroidetes        | beta-GLU            | 0.884       | (0.392; 0.983)    | <i>0.008</i> |
| Myxococcota          | beta-GLU            | 0.928       | (0.582; 0.990)    | <i>0.003</i> |
| Chloroflexi          | TCC                 | -0.867      | (-0.985; -0.185)  | <i>0.026</i> |
| Alphaproteobacteria  | TCC                 | 0.838       | (0.325; 0.970)    | <i>0.009</i> |
| Gammaproteobacteria  | TCC                 | -0.735      | (-0.948; -0.062)  | <i>0.038</i> |
| $\Sigma$ PCBs marker | TCC                 | 0.691       | (0.050; 0.929)    | <i>0.039</i> |
| PCB101               | TCC                 | 0.692       | (0.052; 0.929)    | <i>0.039</i> |
| PCB138               | TCC                 | 0.668       | (0.007; 0.923)    | <i>0.049</i> |
| PCB153               | TCC                 | 0.679       | (0.028; 0.926)    | <i>0.044</i> |
| PCB180               | TCC                 | 0.738       | (0.146; 0.941)    | <i>0.023</i> |
| Myxococcota          | HNA                 | 0.875       | (0.356; 0.981)    | <i>0.010</i> |
| Aldrin               | HNA                 | 0.870       | (0.488; 0.972)    | <i>0.002</i> |
| Aldrin               | LNA                 | -0.870      | (-0.972; -0.488)  | <i>0.002</i> |
| Myxococcota          | Bacteroidetes       | 0.881       | (0.244; 0.987)    | <i>0.020</i> |
| Nitrospirota         | Chloroflexi         | 0.979       | (0.299; 1.000)    | <i>0.021</i> |
| Alphaproteobacteria  | Chloroflexi         | -0.830      | (-0.981; -0.058)  | <i>0.041</i> |
| $\Sigma$ PCBs        | Cyanobacteria       | 0.799       | (0.115; 0.969)    | <i>0.031</i> |
| PCB028               | Cyanobacteria       | 0.755       | (0.005; 0.961)    | <i>0.050</i> |
| Alphaproteobacteria  | Nitrospirota        | -0.954      | (-0.999; 0.089)   | <i>0.046</i> |
| Isodrin              | Nitrospirota        | 0.968       | (0.102; 0.999)    | <i>0.032</i> |
| Gammaproteobacteria  | Alphaproteobacteria | -0.706      | (-0.942; -0.002)  | <i>0.051</i> |
| B[A]P                | unclassified        | 0.898       | (0.077; 0.993)    | <i>0.038</i> |
| $\Sigma$ DDX         | unclassified        | 0.920       | (0.200; 0.995)    | <i>0.027</i> |
| <i>Ice-melt(+)</i>   |                     |             |                   |              |
| Gemmatimonadota      | Acidobacteria       | 0.929       | (-0.303; 0.999)   | <i>0.071</i> |
| Chloroflexi          | Actinobacteria      | -0.934      | (-0.996; -0.297)  | <i>0.020</i> |
| Dieldrin             | Cyanobacteria       | 0.792       | (0.097; 0.968)    | <i>0.034</i> |
| PCB052               | Firmicutes          | -0.998      | (*, *)            | <i>0.039</i> |
| PCB180               | Myxococcota         | 0.947       | (0.393; 0.997)    | <i>0.015</i> |

**Supplementary Table S5.** Pairwise Pearson Correlations (for most significative values) among the inorganic pollutants and biological parameters of sediments during the *Ice-melt(-)* period and *Ice-melt(+)* period. The sample size is given in brackets, and the p value is given in italic.

|                    | Sample 1            | Sample 2            | Correlation | 95% CI for $\rho$ | p-Value |
|--------------------|---------------------|---------------------|-------------|-------------------|---------|
| <i>Ice-melt(-)</i> | Deltaproteobacteria | LAP                 | 0.780       | (0.065; 0.966)    | 0.039   |
|                    | Pb                  | LAP                 | 0.827       | (0.360; 0.962)    | 0.006   |
|                    | Bacteroidetes       | beta-GLU            | 0.884       | (0.392; 0.983)    | 0.008   |
|                    | Myxococcota         | beta-GLU            | 0.928       | (0.582; 0.990)    | 0.003   |
|                    | V                   | beta-GLU            | 0.792       | (0.269; 0.954)    | 0.011   |
|                    | As                  | beta-GLU            | 0.702       | (0.071; 0.932)    | 0.035   |
|                    | Se                  | beta-GLU            | 0.958       | (0.807; 0.991)    | 0.000   |
|                    | Cd                  | beta-GLU            | 0.773       | (0.223; 0.950)    | 0.015   |
|                    | Tl                  | beta-GLU            | 0.799       | (0.288; 0.956)    | 0.010   |
|                    | Mg                  | beta-GLU            | 0.832       | (0.376; 0.964)    | 0.005   |
|                    | Actinobacteria      | AP                  | 0.858       | (0.389; 0.974)    | 0.006   |
|                    | Alphaproteobacteria | TCC                 | 0.838       | (0.325; 0.970)    | 0.009   |
|                    | Gammaproteobacteria | TCC                 | -0.735      | (-0.948; -0.062)  | 0.038   |
|                    | Myxococcota         | HNA                 | 0.875       | (0.356; 0.981)    | 0.010   |
|                    | As                  | HNA                 | 0.682       | (0.033; 0.927)    | 0.043   |
|                    | Chloroflexi         | LNA                 | 0.750       | (-0.157; 0.971)   | 0.086   |
|                    | Mn                  | LNA                 | -0.684      | (-0.927; -0.037)  | 0.042   |
|                    | Myxococcota         | Bacteroidetes       | 0.881       | (0.244; 0.987)    | 0.020   |
|                    | Sn                  | Bacteroidetes       | 0.782       | (0.069; 0.966)    | 0.038   |
|                    | Mg                  | Bacteroidetes       | 0.775       | (0.052; 0.965)    | 0.041   |
|                    | Alphaproteobacteria | Chloroflexi         | -0.830      | (-0.981; -0.058)  | 0.041   |
|                    | Se                  | Chloroflexi         | 0.860       | (0.161; 0.984)    | 0.028   |
|                    | Sn                  | Chloroflexi         | 0.821       | (0.029; 0.980)    | 0.045   |
|                    | Ba                  | Chloroflexi         | 0.869       | (0.196; 0.986)    | 0.025   |
|                    | Tl                  | Chloroflexi         | 0.802       | (-0.028; 0.977)   | 0.055   |
|                    | Pb                  | Deltaproteobacteria | 0.809       | (0.143; 0.971)    | 0.028   |
|                    | Alphaproteobacteria | Nitrospirota        | -0.954      | (-0.999; 0.089)   | 0.046   |
|                    | Ba                  | Nitrospirota        | 0.975       | (0.216; 0.999)    | 0.025   |
|                    | Hg                  | Alphaproteobacteria | 0.731       | (0.054; 0.948)    | 0.039   |
|                    | Hg                  | Gammaproteobacteria | -0.812      | (-0.965; -0.252)  | 0.014   |
| <i>Ice-melt(+)</i> | Gemmatimonadota     | Acidobacteria       | 0.929       | (-0.303; 0.999)   | 0.071   |
|                    | Chloroflexi         | Actinobacteria      | -0.934      | (-0.996; -0.297)  | 0.020   |
|                    | PA-IA               | Deltaproteobacteria | 0.841       | (0.093; 0.982)    | 0.036   |
|                    | PB                  | Deltaproteobacteria | 0.821       | (0.029; 0.980)    | 0.045   |
|                    | Zn                  | TCC                 | -0.730      | (-0.957; 0.051)   | 0.063   |
